# Supplementary material for: Attack Potential Evaluation in Desktop and Smartphone Fingerprint Sensors: Can They Be Attacked by Anyone?
Source: Hindawi journal article supplement (doi:10.1155/2018/5609195), 2018-01-01
Supplement: f1 [file 5609195.f1.zip]

Archive with 2 entries (1 files):
- 5609195.f1/
- 5609195.f1/mat.5609195.v2.mp4
